# Supplementary material for: Development of Neutral Red as a pH/pCO2 Luminescent Sensor for Biological Systems
Source: MDPI journal article supplement (doi:10.3390/chemosensors9080210), 2021-08-05
Supplement: s1 [file s1]

# Development of Neutral Red as a pH/pCO<sub>2</sub> Luminescent Sensor for Biological Systems

Megan N. Ericson <sup>†</sup>, Sindhu K. Shankar <sup>†</sup>, Laya M. Chahine, Mohammad A. Omary, Ione Hunt von Herbing <sup>\*</sup> and Sreekar B. Marpu <sup>\*</sup>

Department of Chemistry, University of North Texas, Denton-76201, TX, USA,  
meganericson2@my.unt.edu (M.N.E.); sindhukonnanurshankar@my.unt.edu (S.K.S.);  
lchahine9@gmail.com (L.M.C.); mohammad.omary@unt.edu (M.A.O.)

<sup>\*</sup> Correspondence: ione.huntvonherbing@unt.edu (I.H.v.H.); sreekarbabu.marpu@unt.edu (S.B.M.);  
Tel.: +940-565-3595 (I.H.v.H.); +940-565-4850 (S.B.M.)

<sup>†</sup> M.N.E. and S.K.S. are equal contributing authors.

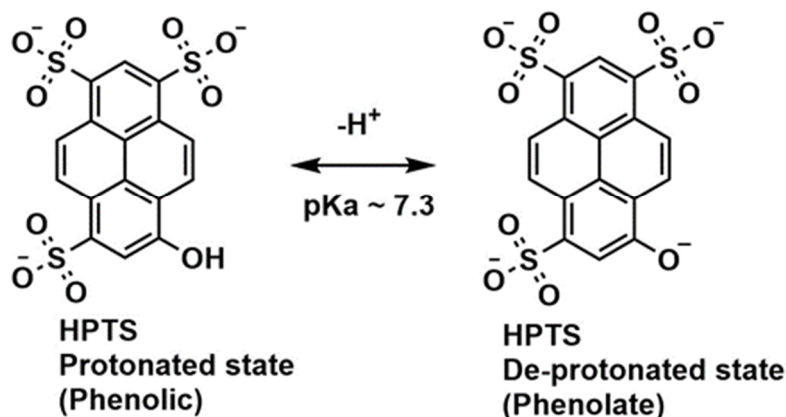

**Scheme S1.** Chemical structure of HPTS molecule showing pKa structural variations at equilibrium.

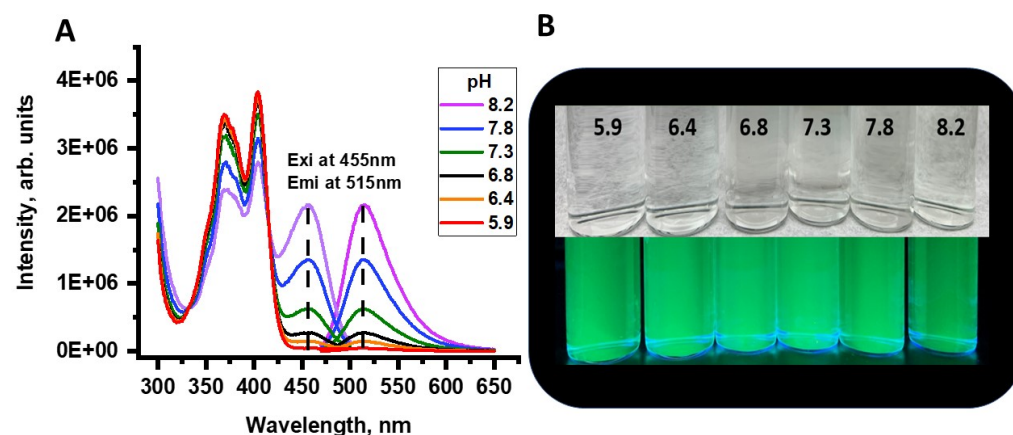

**Scheme S2.** (A) Excitation and emission studies of HPTS in different pH phosphate buffer media ranging from 5.9 to 8.2. (B) The color of the solutions depicted in the picture, TOP: Under ambient light and BOTTOM: Under UV irradiation.

**Citation:** Ericson, M.N.; Shankar, S.K.; Chahine, L.M.; Omary, M.A.; Herbing, I.H.v.; Marpu, S.B. Development of Neutral Red as a pH/pCO<sub>2</sub> Luminescent Sensor for Biological Systems. *Chemosensors* **2021**, *9*, 210.  
<https://doi.org/10.3390/chemosensors9080210>

Academic Editor: José Manuel Costa Fernández

Received: 22 June 2021

Accepted: 28 July 2021

Published: 5 August 2021

**Publisher's Note:** MDPI stays neutral with regard to jurisdictional claims in published maps and institutional affiliations.

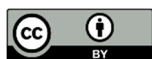

**Copyright:** © 2021 by the authors. Licensee MDPI, Basel, Switzerland. This article is an open access article distributed under the terms and conditions of the Creative Commons Attribution (CC BY) license (<http://creativecommons.org/licenses/by/4.0/>).

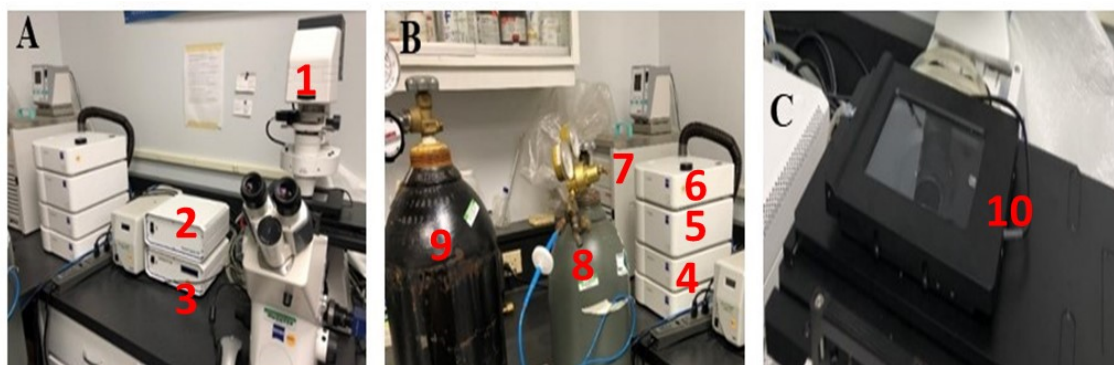

**Scheme S3.** Setup for the epifluorescence microscope. The components are labeled as 1. Zeiss Axio Observer (CAN-BUS) inverted microscope, 2. Power Supply, 3. Definite Focus module, 4. Temperature module, 5. CO<sub>2</sub> module, 6. O<sub>2</sub> module, 7. Heating device/humidity, 8. 100% CO<sub>2</sub> cylinder, 9. 100% N<sub>2</sub> cylinder, 10. Incubator chamber.

**Table S1.** Carbon dioxide sensitivity numbers obtained from absorption and fluorescence measurements. Fluorescence measurements are collected using spectrophotometer (fluorescence), and epifluorescent microscope (fluorescence\*).

|           | Absorbance |               | Fluorescence |               | Fluorescence* |               |
|-----------|------------|---------------|--------------|---------------|---------------|---------------|
|           | %Δ         | Fold-Increase | %Δ           | Fold-Increase | %Δ            | Fold-Increase |
| 0→0.68    | 149.500    | 2.495         | 88.298       | 1.883         | 33.806        | 1.338         |
| 0→1.7     | 232.100    | 3.321         | 128.323      | 2.283         | N/A           | N/A           |
| 0→2.04    | N/A        | N/A           | N/A          | N/A           | 62.468        | 1.625         |
| 0→3.4     | 296.000    | 3.960         | 161.100      | 2.611         | N/A           | N/A           |
| 0→8.5     | 365.200    | 4.652         | 176.205      | 2.762         | N/A           | N/A           |
| 0→17      | 385.8      | 4.858         | 176.354      | 2.764         | N/A           | N/A           |
| 0→34      | 433.6      | 5.336         | 199.335      | 2.993         | 115.265       | 2.153         |
| 0.68→1.7  | 33.106     | 1.331         | 21.256       | 1.213         | N/A           | N/A           |
| 0.68→2.04 | N/A        | N/A           | N/A          | N/A           | 21.4206       | 1.214         |
| 0.68→34   | 111.225    | 2.139         | 58.969       | 1.590         | 60.8784       | 1.609         |
| 2.04→34   | N/A        | N/A           | N/A          | N/A           | 32.4969       | 1.325         |
| 1.7→3.4   | 19.240     | 1.192         | 14.355       | 1.144         | N/A           | N/A           |
| 3.4→8.5   | 17.475     | 1.175         | 5.786        | 1.058         | N/A           | N/A           |
| 8.5→17    | 4.428      | 1.044         | 0.054        | 1.000         | N/A           | N/A           |
| 17→34     | 9.839      | 1.098         | 8.316        | 1.083         | N/A           | N/A           |

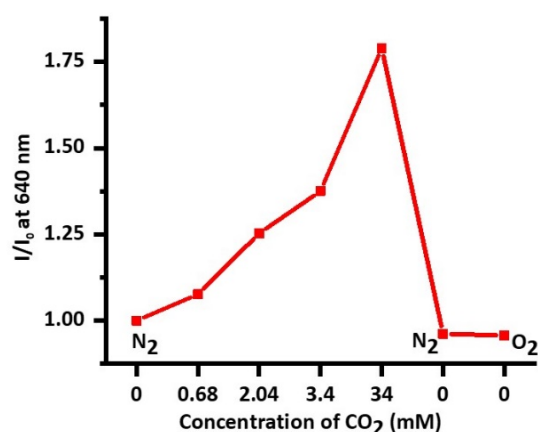

**Scheme S4.** Effect of O<sub>2</sub> gas purging on the emission intensity of NR buffer solution. Refer to last two points in the graph.

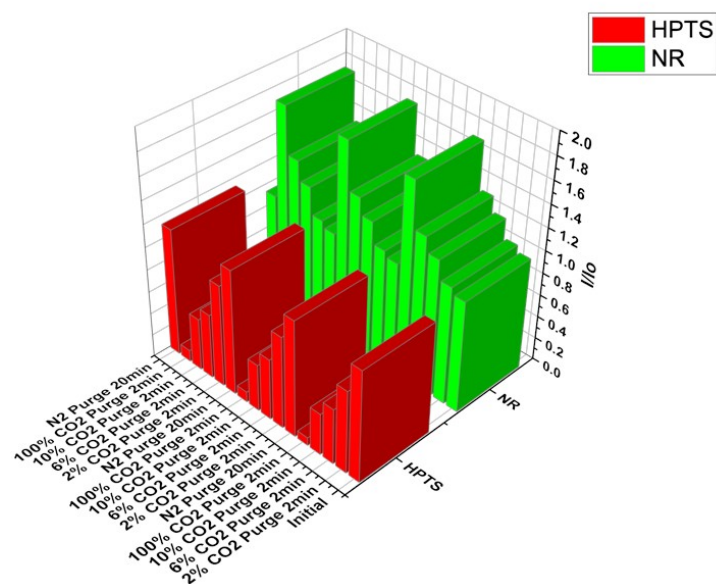

**Scheme S5.** Comparison of emission intensity changes at different CO<sub>2</sub> levels for HPTS and NR in phosphate buffer media.

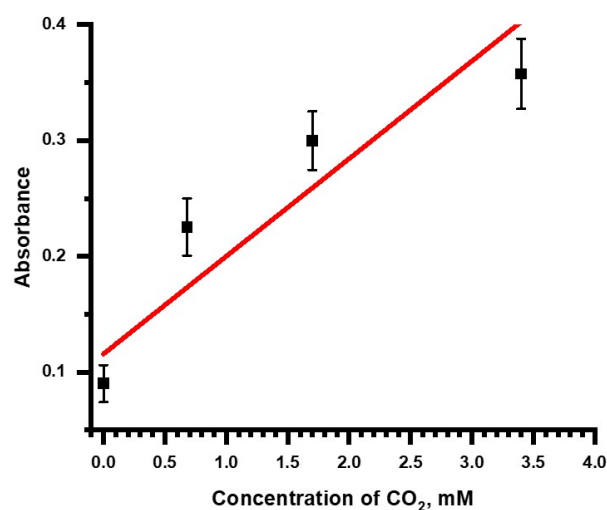

**Scheme S6.** Linear fit analysis for the calculation of residual standard deviation and slope.

**Table S2.** Linear fit analysis for the calculation of residual standard deviation and slope.

|                             |                 |
|-----------------------------|-----------------|
| Slope                       | 0.08429±0.02309 |
| Residual Standard Deviation | 0.0593          |
