# Supplementary material for: Development of Neutral Red as a pH/pCO2 Luminescent Sensor for Biological Systems
Source: MDPI journal article supplement (doi:10.3390/chemosensors9080210), 2021-08-05
Supplement: s1 [file s1]

Archive with 1 entries (1 files):
- chemosensors-1289897-supplementary.pdf
